# Supplementary material for: Cost-Effectiveness of Treatment Optimisation with Biomarkers for Immunotherapy in Solid Tumours: A Systematic Review
Source: MDPI journal article supplement (doi:10.3390/cancers16050995), 2024-02-29
Supplement: s1 [file s1]

# Supplementary Materials: Cost-Effectiveness of Treatment Optimisation with Biomarkers for Immunotherapy in Solid Tumours: A Systematic Review

Sara Mucherino, Valentina Lorenzoni, Isotta Triulzi, Marzia Del Re, Valentina Orlando, Annalisa Capuano, Romano Danesi, Giuseppe Turchetti and Enrica Menditto

## Supplement Box S1. Search Strategy

| Query | Keywords (in Mesh OR Title and Abstract)                                                                                                                                                                        | PubMed    | Embase    |
|-------|-----------------------------------------------------------------------------------------------------------------------------------------------------------------------------------------------------------------|-----------|-----------|
| #1    | Antibodies, monoclonal                                                                                                                                                                                          | 234,701   | 534,564   |
| #2    | Immunotherapy                                                                                                                                                                                                   | 315,085   | 230,610   |
| #3    | (nivolumab/ipilimumab[Title/Abstract])                                                                                                                                                                          | 9,625     | 32,770    |
|       | OR                                                                                                                                                                                                              |           |           |
|       | ipilimumab[Title/Abstract])                                                                                                                                                                                     |           |           |
|       | OR                                                                                                                                                                                                              |           |           |
|       | durvalumab[Title/Abstract])                                                                                                                                                                                     |           |           |
|       | OR                                                                                                                                                                                                              |           |           |
| #3    | atezolizumab[Title/Abstract])                                                                                                                                                                                   | 9,625     | 32,770    |
|       | OR                                                                                                                                                                                                              |           |           |
|       | nivolumab[Title/Abstract])                                                                                                                                                                                      |           |           |
|       | OR                                                                                                                                                                                                              |           |           |
|       | pembrolizumab[Title/Abstract])                                                                                                                                                                                  |           |           |
|       | OR                                                                                                                                                                                                              |           |           |
| #3    | "Ipilimumab"[Mesh]) OR "durvalumab" [Supplementary Concept]) OR "avelumab" [Supplementary Concept]) OR "atezolizumab" [Supplementary Concept]) OR "Nivolumab"[Mesh]) OR "pembrolizumab" [Supplementary Concept] | 9,625     | 32,770    |
|       | OR                                                                                                                                                                                                              |           |           |
| #4    | Immune checkpoint inhibitor                                                                                                                                                                                     | 27,009    | 22,451    |
| #5    | Neoplasms                                                                                                                                                                                                       | 3,340,811 | 3,956,642 |
| #6    | Cancer                                                                                                                                                                                                          | 3,785,562 | 3,707,300 |
| #7    | Carcinoma                                                                                                                                                                                                       | 911,084   | 1,209,542 |
| #8    | Tumor OR Tumor                                                                                                                                                                                                  | 1,283,887 | 1,580,661 |
| #9    | Target therapy OR Chemotherapy                                                                                                                                                                                  | 406,424   | 772,722   |
| #10   | Biomarkers OR PD-1 OR Programmed Death 1 OR PD-L1 OR Programmed Death Ligand 1 OR IL-6 OR Interleukin-6 OR CTLA-4                                                                                               | 404,251   | 565,451   |
| #11   | Cost benefit analysis                                                                                                                                                                                           | 82,517    | 60,024    |
| #12   | Cost effectiveness                                                                                                                                                                                              | 109,292   | 162,052   |
| #13   | Cost utility                                                                                                                                                                                                    | 4,773     | 10,928    |
| #14   | Economic evaluation                                                                                                                                                                                             | 85,211    | 251,560   |
| #15   | Quality of life                                                                                                                                                                                                 | 327,312   | 495,744   |
| #16   | 1 OR 2 OR 3 OR 4                                                                                                                                                                                                | 110,915   | 297,320   |
| #17   | 5 OR 6 OR 7 OR 8                                                                                                                                                                                                | 3,073,490 | 3,573,285 |
| #18   | 11 OR 12 OR 13 OR 14 OR 15                                                                                                                                                                                      | 386,004   | 652,103   |
| #19   | 16 AND 17                                                                                                                                                                                                       | 71,773    | 140,761   |
| #20   | 19 AND 9 AND 10                                                                                                                                                                                                 | 3,763     | 10,894    |
| #21   | 20 AND 18                                                                                                                                                                                                       | 164       | 566       |

## Supplement Box S2. Search Syntaxes

### PubMed

("antibodies monoclonal"[Title/Abstract] OR "Immunotherapy"[Title/Abstract] OR ("nivolumab ipilimumab"[Title/Abstract] OR "Ipilimumab"[Title/Abstract]) OR "durvalumab"[Title/Abstract] OR "atezolizumab"[Title/Abstract] OR "Nivolumab"[Title/Abstract] OR "pembrolizumab"[Title/Abstract] OR "Ipilimumab"[MeSH Terms] OR "durvalumab"[Supplementary Concept] OR "avelumab"[Supplementary Concept] OR "atezolizumab"[Supplementary Concept] OR "Nivolumab"[MeSH Terms] OR "pembrolizumab"[Supplementary Concept] OR "immune checkpoint inhibitor"[Title/Abstract]) AND ("Neoplasms"[Title/Abstract] OR "Cancer"[Title/Abstract] OR "Carcinoma"[Title/Abstract] OR "Tumor"[Title/Abstract] OR "Toumor"[Title/Abstract]) AND ("target therapy"[Title/Abstract] OR "Chemotherapy"[Title/Abstract]) AND ("Biomarkers"[Title/Abstract] OR "PD-1"[Title/Abstract] OR "programmed death 1"[Title/Abstract] OR "PD-L1"[Title/Abstract] OR "programmed death ligand 1"[Title/Abstract] OR "IL-6"[Title/Abstract] OR "Interleukin-6"[Title/Abstract] OR "CTLA-4"[Title/Abstract]) AND ("cost benefit analysis"[Title/Abstract] OR "cost effectiveness"[Title/Abstract] OR "cost utility"[Title/Abstract] OR "economic evaluation"[Title/Abstract] OR "quality of life"[Title/Abstract]) Sort by: Publication Date

### EMBASE

(cost AND benefit AND analysis:ti,ab,kw OR (cost AND effectiveness:ti,ab,kw) OR (cost AND utility:ti,ab,kw) OR (economic AND evaluation:ti,ab,kw) OR (quality AND of AND life:ti,ab,kw)) AND (target AND therapy:ti,ab,kw OR chemotherapy:ti,ab,kw) AND (biomarkers:ti,ab,kw OR 'pd 1':ti,ab,kw OR (programmed AND death AND 1:ti,ab,kw) OR 'pd l1':ti,ab,kw OR (programmed AND death AND ligand AND 1:ti,ab,kw) OR 'il 6':ti,ab,kw OR 'interleukin 6':ti,ab,kw OR 'ctla 4':ti,ab,kw) AND ((antibodies AND monoclonal:ti,ab,kw OR immunotherapy:ti,ab,kw OR (immune AND checkpoint AND inhibitor:ti,ab,kw)) AND [embase]/lim OR ((nivolumab:ti,ab,kw OR ipilimumab:ti,ab,kw OR durvalumab:ti,ab,kw OR atezolizumab:ti,ab,kw OR pembrolizumab:ti,ab,kw OR avelumab:ti,ab,kw) AND [embase]/lim)) AND (neoplasms:ti,ab,kw OR cancer:ti,ab,kw OR carcinoma:ti,ab,kw OR tumor:ti,ab,kw OR toumor:ti,ab,kw) AND [embase]/lim

**Supplementary Table S1.** Key features of economic methods for the overall included studies

| Study Reference, year                | Study design                       | Type of Economic evaluation | Perspective used in the analysis | Type of costs included | Reference year of costs                  | Sensitivity analysis      |
|--------------------------------------|------------------------------------|-----------------------------|----------------------------------|------------------------|------------------------------------------|---------------------------|
| Barbier MC et al., 2021 <sup>9</sup> | Markov model                       | Cost-effectiveness analysis | Switzerland third-party payer    | Direct health costs    | CHF without reference to the year        | One-way and probabilistic |
| Chang WC et al. 2021 <sup>67</sup>   | De novo partitioned-survival model | Cost-utility analysis       | Taiwan third-party payer         | Direct health costs    | 2020 New Taiwan dollars (NT\$)           | One-way                   |
| Cheng S et al 2021 <sup>33</sup>     | Partitioned survival model         | Cost-effectiveness analysis | US and China third-party payer   | Direct health costs    | 2021 US dollars                          | One-way and probabilistic |
| Liu X et al 2021 <sup>62</sup>       | Partitioned survival model         | Cost-effectiveness analysis | Chinese third-party payer        | Direct health costs    | 2021 US dollars                          | One-way and probabilistic |
| Liu G et al 2021 <sup>34</sup>       | Decision-analytic model            | Cost-effectiveness analysis | Chinese third-party payer        | Direct health costs    | 2019 US dollars                          | One-way and probabilistic |
| Hu H et al 2021 <sup>12</sup>        | Markov model                       | Cost-effectiveness analysis | US third-party payer             | Direct health costs    | US dollars without reference to the year | One-way                   |
| Shi Y et al 2021 <sup>68</sup>       | Partitioned survival model         | Cost-effectiveness analysis | US third-party payer             | Direct health costs    | 2021 US dollars                          | One-way and probabilistic |

|                                        |                                                        |                                                                           |                                             |                           |                                                                                                           |                                       |
|----------------------------------------|--------------------------------------------------------|---------------------------------------------------------------------------|---------------------------------------------|---------------------------|-----------------------------------------------------------------------------------------------------------|---------------------------------------|
| Cai Y et al<br>2021 <sup>35</sup>      | Survival analysis<br>and partitioned<br>survival model | Cost-<br>effectiveness<br>analysis                                        | China third-<br>party payer                 | Direct<br>health<br>costs | 2020 US<br>dollars using<br>the exchange<br>rate: 1 US<br>dollar =<br>6.4721<br>Chinese yuan<br>renminbi. | Deterministic<br>and<br>probabilistic |
| Qin S et al<br>2021 <sup>47</sup>      | Markov model                                           | Cost-<br>effectiveness<br>analysis                                        | US third-party<br>payer                     | Direct<br>health<br>costs | 2021 US<br>dollars                                                                                        | One-way<br>and<br>probabilistic       |
| Peng Y et al<br>2021 <sup>48</sup>     | Markov model                                           | Cost-<br>effectiveness<br>analysis                                        | China third-<br>party payer                 | Direct<br>health<br>costs | 2021 US<br>dollars                                                                                        | One-way<br>and<br>probabilistic       |
| Qiao L et al<br>2021 <sup>13</sup>     | Markov model                                           | Cost-<br>effectiveness<br>analysis                                        | China third-<br>party payer                 | Direct<br>health<br>costs | 2020 US<br>dollars                                                                                        | Deterministic<br>and<br>probabilistic |
| Yang SC et<br>al 2021 <sup>36</sup>    | Markov model                                           | Cost-<br>effectiveness<br>analysis                                        | US third-party<br>payer                     | Direct<br>health<br>costs | 2020 US<br>dollars                                                                                        | One-way<br>deterministic              |
| Wurcel V et<br>al 2021 <sup>56</sup>   | Partitioned survival<br>model                          | Cost-<br>effectiveness<br>analysis                                        | Argentina<br>social security<br>perspective | Direct<br>health<br>costs | 2020<br>Argentinian<br>pesos                                                                              | One-way<br>deterministic              |
| Insinga RP<br>et al 2021 <sup>11</sup> | Markov model                                           | Cost-<br>effectiveness<br>analysis                                        | US third-party<br>payer                     | Direct<br>health<br>costs | 2019 US<br>dollars                                                                                        | One-way<br>and<br>probabilistic       |
| Peng Y et al<br>2021 <sup>37</sup>     | Markov model                                           | Cost-<br>effectiveness<br>analysis                                        | US third-party<br>payer                     | Direct<br>health<br>costs | 2020 US<br>dollars                                                                                        | Deterministic                         |
| Liu Q et al<br>2021 <sup>14</sup>      | Markov model                                           | Cost-<br>Effectiveness<br>Analysis<br>based on the<br>3-year<br>follow-up | US third-party<br>payer                     | Direct<br>health<br>costs | 2021 US<br>dollars                                                                                        | Univariate<br>and<br>probabilistic    |
| Panje CM et<br>al 2020 <sup>15</sup>   | Markov model                                           | Cost-<br>Effectiveness<br>Analysis;<br>lifetime<br>horizon                | Switzerland<br>third-party<br>payer         | Direct<br>health<br>costs | 2019 CHF                                                                                                  | One-way<br>deterministic              |
| Wan N et al<br>2020 <sup>38</sup>      | Markov model                                           | Cost-<br>effectiveness<br>Analysis;<br>lifetime<br>horizon                | US and China<br>third-party<br>payer        | Direct<br>health<br>costs | 2018 US<br>dollars                                                                                        | Univariate<br>and<br>probabilistic    |
| Weng X et<br>al 2020 <sup>63</sup>     | Markov model                                           | Cost-Utility<br>Analysis;<br>lifetime<br>horizon                          | US third-party<br>payer                     | Direct<br>health<br>costs | 2019 US<br>dollars                                                                                        | One-way<br>and<br>probabilistic       |
| Weng X et<br>al 2020 <sup>16</sup>     | Markov model                                           | Cost-<br>Effectiveness<br>Analysis; 10<br>years<br>horizon                | US payer<br>perspective                     | Direct<br>health<br>costs | US dollars<br>without<br>reference to<br>the year                                                         | One-way<br>and<br>probabilistic       |

|                                         |                               |                                                                                 |                                      |                           |                                                                 |                                          |
|-----------------------------------------|-------------------------------|---------------------------------------------------------------------------------|--------------------------------------|---------------------------|-----------------------------------------------------------------|------------------------------------------|
| Wu B et al<br>2020 <sup>64</sup>        | Markov model                  | Cost-<br>Effectiveness<br>Analysis; 10<br>years<br>horizon                      | US third-party<br>payer              | Direct<br>health<br>costs | 2018 US<br>dollars                                              | One-way<br>and<br>probabilistic          |
| Zhou K et al<br>2020 <sup>57</sup>      | Markov model                  | Cost-utility<br>analysis                                                        | US third-party<br>payer              | Direct<br>health<br>costs | 2019 US<br>dollars                                              | One-way<br>deterministic                 |
| Criss SD et<br>al 2020 <sup>39</sup>    | Markov model                  | Cost-utility<br>analysis<br>over 5 years                                        | US third-party<br>payer              | Direct<br>health<br>costs | 2019 US<br>dollars                                              | Deterministic<br>and<br>probabilistic    |
| Lauren B et<br>al 2020 <sup>69</sup>    | Markov model                  | Cost-utility<br>analysis<br>lifetime                                            | US third-party<br>payer              | Direct<br>health<br>costs | 2018 US<br>dollars                                              | One-way<br>and<br>probabilistic          |
| Liu Q et al<br>2020 <sup>40</sup>       | Partitioned survival<br>model | Cost-utility<br>analysis                                                        | China third-<br>party payer          | Direct<br>health<br>costs | 2018 US<br>dollars                                              | One-way                                  |
| Parmar A et<br>al 2020 <sup>54</sup>    | Markov model                  | Cost-<br>effectiveness<br>analysis                                              | Canada third-<br>party payer         | Direct<br>health<br>costs | 2018<br>Canadian<br>dollars                                     | One-way<br>and<br>probabilistic          |
| Rothwell B<br>et al 2020 <sup>17</sup>  | Partitioned-survival<br>model | Cost-<br>effectiveness<br>analysis                                              | England third-<br>party payer        | Direct<br>health<br>costs | 2015 English<br>pounds                                          | One-way<br>and<br>probabilistic          |
| Li J et al<br>2020 <sup>18</sup>        | Partitioned survival<br>model | Cost-<br>effectiveness<br>analysis                                              | US third-party<br>payer              | Direct<br>health<br>costs | 2019 US<br>dollars                                              | One-way<br>and<br>probabilistic          |
| Aziz MIA et<br>al 2020 <sup>41</sup>    | Decision-analytic<br>model    | Cost-<br>effectiveness<br>analysis                                              | Singapore<br>third-party<br>payer    | Direct<br>health<br>costs | Singapore<br>SGD dollars<br>without<br>reference to<br>the year | One-way<br>and<br>probabilistic          |
| Hale O et al<br>2020 <sup>49</sup>      | Partitioned survival<br>model | Cost-<br>Effectiveness<br>Analysis; a<br>time horizon<br>of 15 yr<br>(lifetime) | US third-party<br>payer              | Direct<br>health<br>costs | 2018 US<br>dollars                                              | Deterministic                            |
| Wu B et al<br>2020 <sup>19</sup>        | Markov model                  | Cost-<br>Effectiveness<br>Analysis; 20<br>years<br>horizon                      | US and China<br>third-party<br>payer | Direct<br>health<br>costs | 2018 US<br>dollars                                              | One-way,<br>two-way and<br>probabilistic |
| Patterson K<br>et al 2019 <sup>50</sup> | Markov model                  | Cost-<br>Effectiveness<br>Analysis;<br>lifetime                                 | Sweden third-<br>party payer         | Direct<br>health<br>costs | 2018 Euro                                                       | One-way<br>and<br>probabilistic          |
| Reinhorn D<br>et al 2019 <sup>53</sup>  | Markov model                  | Cost-<br>Effectiveness<br>Analysis; 10<br>years<br>horizon                      | US third-party<br>payer              | Direct<br>health<br>costs | 2017 US<br>dollars                                              | One-way<br>and<br>probabilistic          |
| Longjiang S<br>et al 2019 <sup>20</sup> | Markov model                  | Cost-<br>effectiveness<br>Analysis;                                             | US third-party<br>payer              | Direct<br>health<br>costs | 2016 US<br>dollars                                              | Univariate<br>and<br>probabilistic       |

|                                     |                            |                                                             |                                |                     |                        |                                                         |
|-------------------------------------|----------------------------|-------------------------------------------------------------|--------------------------------|---------------------|------------------------|---------------------------------------------------------|
|                                     |                            | lifetime (30 years)                                         |                                |                     |                        |                                                         |
| Wan X et al 2019 <sup>42</sup>      | Partitioned-survival model | Cost-effectiveness and cost-utility analysis over 10 years  | US third-party payer           | Direct health costs | 2018 US dollars        | Univariate deterministic and multivariate probabilistic |
| Zhou K et al 2019 <sup>43</sup>     | Markov model               | Cost-effectiveness analysis                                 | China third-party payer        | Direct health costs | 2019 US dollars        | Deterministic                                           |
| Bhadhuri A et al 2019 <sup>21</sup> | Partitioned-survival model | Cost-effectiveness and cost-utility analysis over 20 years  | Switzerland third-party payer  | Direct health costs | 2018 CHF               | One-way deterministic and probabilistic                 |
| Chouaid C et al 2019 <sup>22</sup>  | Partitioned-survival model | Cost-effectiveness and cost-utility analysis; lifetime      | France third-party payer       | Direct health costs | 2017 Euro              | One-way deterministic                                   |
| Criss SD et al 2019 <sup>51</sup>   | Microsimulation model      | Cost-effectiveness analysis                                 | US third-party payer           | Direct health costs | 2017 US dollars        | One-way deterministic                                   |
| Huang M et al 2019 <sup>23</sup>    | Partitioned survival model | Cost-effectiveness analysis                                 | US third-party payer           | Direct health costs | 2019 US dollars        | One-way and two-way deterministic                       |
| Insinga RP et al 2019 <sup>31</sup> | Markov model               | Cost-effectiveness analysis                                 | US third-party payer           | Direct health costs | 2018 US dollars        | One-way probabilistic                                   |
| Liu M et al 2019 <sup>58</sup>      | Markov model               | Cost-Effectiveness Analysis, duration of 2 years            | China and US third-party payer | Direct health costs | 2018 US dollars        | Probabilistic                                           |
| Loong HH et al 2019 <sup>30</sup>   | Markov model               | Cost-Effectiveness Analysis; 1 mo over a 10-yr time horizon | Hong Kong                      | Direct health costs | Hong Kong (HK) dollars | Univariate and probabilistic                            |
| Liao W et al 2019 <sup>44</sup>     | Markov model               | Cost-Effectiveness Analysis                                 | China third-party payer        | Direct health costs | 2017 US dollars        | Univariate                                              |
| Meng Y et al 2018 <sup>65</sup>     | Markov model               | Cost-utility analysis lifetime                              | England third-party payer      | Direct health costs | 2017 british pounds    | Probabilistic                                           |
| Sarfaty M et al 2018 <sup>52</sup>  | Markov model               | Cost-utility analysis                                       | US third-party payer           | Direct health costs | 2016 US dollars        | Univariate and probabilistic                            |

|                                           |                                      |                                                        |                                                |                     |                                          |                                 |
|-------------------------------------------|--------------------------------------|--------------------------------------------------------|------------------------------------------------|---------------------|------------------------------------------|---------------------------------|
| Sarfaty M et al 2018 <sup>55</sup>        | Markov model                         | Cost-Effectiveness Analysis; 1 mo over a 5-yr time     | US, UK, Canada and Australia third-party payer | Direct health costs | 2017 US dollars                          | Univariate and probabilistic    |
| Tarhini A et al 2018 <sup>66</sup>        | Markov model                         | Cost-utility analysis over lifetime                    | US third-party payer                           | Direct health costs | 2016 US dollars                          | Deterministic and probabilistic |
| Zargar M et al 2018 <sup>59</sup>         | Cohort based, state transition model | Cost-utility analysis over 5 years                     | Canada third-party payer                       | Direct health costs | 2016 Canadian dollars                    | Univariate and probabilistic    |
| Aguiar P et al 2018 <sup>45</sup>         | Markov model                         | Cost-Effectiveness over 5 years and budget impact      | Argentina, Brazil and Peru third-party payer   | Direct health costs | US dollars without reference to the year | None                            |
| Hirschmann A et al 2018 <sup>60</sup>     | Markov model                         | Cost-effectiveness over 60 months                      | Switzerland third-party payer                  | Direct health costs | 2018 CHF                                 | Univariate and probabilistic    |
| Hu x et al 2018 <sup>32</sup>             | Markov model                         | Cost-Effectiveness and cost-utility analysis           | UK third-party payer                           | Direct health costs | 2017 British pounds                      | Univariate and probabilistic    |
| Insinga RP et al 2018 <sup>25</sup>       | Cohort based simulation model        | Cost-utility analysis; lifetime                        | US third-party payer                           | Direct health costs | 2017 US dollars                          | Univariate and probabilistic    |
| Georgieva M et al 2018 <sup>26</sup>      | Bayesian Markov model                | Cost-utility analysis; lifetime                        | US and UK third-party payer                    | Direct health costs | 2018 US dollars                          | Probabilistic                   |
| Ward MC et al 2017 <sup>61</sup>          | Markov model                         | Cost-utility analysis over 36 months                   | US third-party payer                           | Direct health costs | 2017 US dollars                          | Univariate and probabilistic    |
| Aguiar PN Jr et al 2017 <sup>27</sup>     | RCT-based model                      | Cost-utility analysis                                  | South America third-party payer                | Direct health costs | US dollars without reference to the year | None                            |
| Huang M et al 2017 <sup>29</sup>          | Partitioned survival model           | Cost-effectiveness and cost-utility analysis; lifetime | US third-party payer                           | Direct health costs | 2016 US dollars                          | Univariate and probabilistic    |
| Matter-Walstra K et al 2016 <sup>46</sup> | Markov model                         | Cost-utility analysis                                  | Switzerland third-party payer                  | Direct health costs | 2016 CHF                                 | Univariate and probabilistic    |

*Abbreviations: Swiss francs (CHF); Randomized controlled trial (RCT); United States (US); United Kingdom (UK)*

**Supplementary Table S2.** Quality appraisal of individual included studies according to GRADE scale

| Study Reference, year                | Quality appraisal (GRADE scale) (n=59 studies) |                                                                                                                                                            |
|--------------------------------------|------------------------------------------------|------------------------------------------------------------------------------------------------------------------------------------------------------------|
|                                      | Scoring                                        | Appraisal                                                                                                                                                  |
| Barbier MC et al., 2021 <sup>9</sup> | High<br>⊕⊕⊕⊕                                   | The true effect lies close to that of the estimate of the effect.                                                                                          |
| Chang WC et al. 2021 <sup>67</sup>   | Moderate<br>⊕⊕⊕○                               | Rarity of disease. Such low disease prevalence may result in heterogeneity of disease diagnosis and treatment effect.                                      |
| Cheng S et al 2021 <sup>33</sup>     | High<br>⊕⊕⊕⊕                                   | The true effect lies close to that of the estimate of the effect.                                                                                          |
| Liu X et al 2021 <sup>62</sup>       | Moderate<br>⊕⊕⊕○                               | Limitation related to generalizability.                                                                                                                    |
| Liu G et al 2021 <sup>34</sup>       | Moderate<br>⊕⊕⊕○                               | The effect estimate as the true effect is likely to be close to the estimate of the effect, but there is a possibility that it is quite different.         |
| Hu H et al 2021 <sup>12</sup>        | Moderate<br>⊕⊕⊕○                               | The effect estimate as the true effect is likely to be close to the estimate of the effect, but there is a possibility that it is quite different.         |
| Shi Y et al 2021 <sup>68</sup>       | Moderate<br>⊕⊕⊕○                               | The effect estimate as the true effect is likely to be close to the estimate of the effect, but there is a possibility that it is quite different.         |
| Cai Y et al 2021 <sup>35</sup>       | High<br>⊕⊕⊕⊕                                   | The true effect lies close to that of the estimate of the effect                                                                                           |
| Qin S et al 2021 <sup>47</sup>       | High<br>⊕⊕⊕⊕                                   | The true effect lies close to that of the estimate of the effect                                                                                           |
| Peng Y et al 2021 <sup>48</sup>      | Moderate<br>⊕⊕⊕○                               | Limitation related to generalizability.                                                                                                                    |
| Qiao L et al 2021 <sup>13</sup>      | Moderate<br>⊕⊕⊕○                               | Bias in the economic results.<br>The effect estimate as the true effect is likely to be close to the estimate of the effect.                               |
| Yang SC et al 2021 <sup>36</sup>     | Moderate/High<br>⊕⊕⊕○                          | The effect estimate as the true effect is likely to be close to the estimate of the effect.                                                                |
| Wurcel V et al 2021 <sup>56</sup>    | Moderate<br>⊕⊕⊕○                               | The effect estimate as the true effect is likely to be close to the estimate of the effect, but there is a possibility that it is quite different.         |
| Insinga RP et al 2021 <sup>11</sup>  | Moderate/High<br>⊕⊕⊕○                          | The effect estimate as the true effect is likely to be close to the estimate of the effect.                                                                |
| Peng Y et al 2021 <sup>37</sup>      | Moderate/Low<br>⊕⊕○ ○                          | The effect estimate as the true effect is likely to be close to the estimate of the effect, but there is a possibility that it is substantially different. |
| Liu Q et al 2021 <sup>14</sup>       | Moderate/High<br>⊕⊕⊕○                          | The effect estimate as the true effect is likely to be close to the estimate of the effect.                                                                |
| Panje CM et al 2020 <sup>15</sup>    | Moderate/High<br>⊕⊕⊕○                          | The effect estimate as the true effect is likely to be close to the estimate of the effect.                                                                |
| Wan N et al 2020 <sup>38</sup>       | Moderate/High<br>⊕⊕⊕○                          | The effect estimate as the true effect is likely to be close to the estimate of the effect.                                                                |

| Weng X et al 2020 <sup>63</sup>        | Moderate/Low<br>⊕⊕○○  | Limitation related to generalizability.<br>The effect estimate as the true effect is likely to be close to the estimate of the effect, but there is a possibility that it is substantially different. |
|----------------------------------------|-----------------------|-------------------------------------------------------------------------------------------------------------------------------------------------------------------------------------------------------|
| Study Reference, year                  | Scoring               | Appraisal                                                                                                                                                                                             |
| Weng X et al 2020 <sup>16</sup>        | Moderate<br>⊕⊕⊕○      | The effect estimate as the true effect is likely to be close to the estimate of the effect, but there is a possibility that it is quite different.                                                    |
| Wu B et al 2020 <sup>64</sup>          | Moderate<br>⊕⊕⊕○      | The effect estimate as the true effect is likely to be close to the estimate of the effect, but there is a possibility that it is quite different.                                                    |
| Zhou K et al 2020 <sup>57</sup>        | Moderate/High<br>⊕⊕⊕○ | The effect estimate as the true effect is likely to be close to the estimate of the effect                                                                                                            |
| Criss SD et al 2020 <sup>39</sup>      | Moderate/High<br>⊕⊕⊕○ | The effect estimate as the true effect is likely to be close to the estimate of the effect                                                                                                            |
| Lauren B et al 2020 <sup>69</sup>      | Moderate/High<br>⊕⊕⊕○ | The effect estimate as the true effect is likely to be close to the estimate of the effect                                                                                                            |
| Liu Q et al 2020 <sup>40</sup>         | Moderate/High<br>⊕⊕⊕○ | The effect estimate as the true effect is likely to be close to the estimate of the effect                                                                                                            |
| Parmar A et al 2020 <sup>54</sup>      | Moderate/High<br>⊕⊕⊕○ | The effect estimate as the true effect is likely to be close to the estimate of the effect                                                                                                            |
| Rothwell B et al 2020 <sup>17</sup>    | Moderate/High<br>⊕⊕⊕○ | The effect estimate as the true effect is likely to be close to the estimate of the effect                                                                                                            |
| Li J et al 2020 <sup>18</sup>          | Moderate/High<br>⊕⊕⊕○ | The effect estimate as the true effect is likely to be close to the estimate of the effect                                                                                                            |
| Aziz MIA et al 2020 <sup>41</sup>      | Moderate<br>⊕⊕⊕○      | The effect estimate as the true effect is likely to be close to the estimate of the effect, but there is a possibility that it is quite different.                                                    |
| Hale O et al 2020 <sup>49</sup>        | Moderate<br>⊕⊕⊕○      | The effect estimate as the true effect is likely to be close to the estimate of the effect, but there is a possibility that it is quite different.                                                    |
| Wu B et al 2020 <sup>19</sup>          | Moderate/High<br>⊕⊕⊕○ | The effect estimate as the true effect is likely to be close to the estimate of the effect.                                                                                                           |
| Patterson K et al 2019 <sup>50</sup>   | Moderate/High<br>⊕⊕⊕○ | The effect estimate as the true effect is likely to be close to the estimate of the effect.                                                                                                           |
| Reinhorn D et al 2019 <sup>53</sup>    | Moderate/High<br>⊕⊕⊕○ | The effect estimate as the true effect is likely to be close to the estimate of the effect.                                                                                                           |
| Longjiang She et al 2019 <sup>20</sup> | Moderate/High<br>⊕⊕⊕○ | The effect estimate as the true effect is likely to be close to the estimate of the effect.                                                                                                           |
| Wan X et al 2019 <sup>42</sup>         | Moderate/High<br>⊕⊕⊕○ | The effect estimate as the true effect is likely to be close to the estimate of the effect.                                                                                                           |
| Zhou K et al 2019 <sup>43</sup>        | Moderate/High<br>⊕⊕⊕○ | The effect estimate as the true effect is likely to be close to the estimate of the effect.                                                                                                           |
| Bhadhuri A et al 2019 <sup>21</sup>    | Moderate/High<br>⊕⊕⊕○ | The effect estimate as the true effect is likely to be close to the estimate of the effect.                                                                                                           |



|                                       |                       |                                                                                                                                                            |
|---------------------------------------|-----------------------|------------------------------------------------------------------------------------------------------------------------------------------------------------|
| Chouaid C et al 2019 <sup>22</sup>    | Moderate/High<br>⊕⊕⊕○ | The effect estimate as the true effect is likely to be close to the estimate of the effect.                                                                |
| Criss SD et al 2019 <sup>51</sup>     | Moderate/High<br>⊕⊕⊕○ | The effect estimate as the true effect is likely to be close to the estimate of the effect.                                                                |
| Huang M et al 2019 <sup>23</sup>      | Moderate/High<br>⊕⊕⊕○ | The effect estimate as the true effect is likely to be close to the estimate of the effect.                                                                |
| <b>Study Reference, year</b>          | <b>Scoring</b>        | <b>Appraisal</b>                                                                                                                                           |
| Insinga RP et al 2019 <sup>31</sup>   | Moderate/High<br>⊕⊕⊕○ | The effect estimate as the true effect is likely to be close to the estimate of the effect.                                                                |
| Liu M et al 2019 <sup>58</sup>        | Moderate<br>⊕⊕⊕○      | Limitation related to generalizability.                                                                                                                    |
| Loong HH et al 2019 <sup>30</sup>     | Moderate/High<br>⊕⊕⊕○ | The effect estimate as the true effect is likely to be close to the estimate of the effect.                                                                |
| Liao W et al 2019 <sup>44</sup>       | Moderate/Low<br>⊕⊕○ ○ | The effect estimate as the true effect is likely to be close to the estimate of the effect, but there is a possibility that it is substantially different. |
| Meng Y et al 2018 <sup>65</sup>       | Moderate/High<br>⊕⊕⊕○ | The effect estimate as the true effect is likely to be close to the estimate of the effect.                                                                |
| Sarfaty M et al 2018 <sup>52</sup>    | Moderate/High<br>⊕⊕⊕○ | The effect estimate as the true effect is likely to be close to the estimate of the effect.                                                                |
| Sarfaty M et al 2018 <sup>55</sup>    | Moderate/High<br>⊕⊕⊕○ | The effect estimate as the true effect is likely to be close to the estimate of the effect.                                                                |
| Tarhini A et al 2018 <sup>66</sup>    | Moderate/High<br>⊕⊕⊕○ | The effect estimate as the true effect is likely to be close to the estimate of the effect.                                                                |
| Zargar M et al 2018 <sup>59</sup>     | Moderate/High<br>⊕⊕⊕○ | The effect estimate as the true effect is likely to be close to the estimate of the effect.                                                                |
| Aguiar P et al 2018 <sup>45</sup>     | Moderate<br>⊕⊕⊕○      | The effect estimate as the true effect is likely to be close to the estimate of the effect, but there is a possibility that it is quite different.         |
| Hirschmann A et al 2018 <sup>60</sup> | Moderate/High<br>⊕⊕⊕○ | The effect estimate as the true effect is likely to be close to the estimate of the effect.                                                                |
| Hu x et al 2018 <sup>32</sup>         | Moderate/High<br>⊕⊕⊕○ | The effect estimate as the true effect is likely to be close to the estimate of the effect.                                                                |
| Insinga RP et al 2018 <sup>25</sup>   | Moderate/High<br>⊕⊕⊕○ | The effect estimate as the true effect is likely to be close to the estimate of the effect.                                                                |
| Georgieva M et al 2018 <sup>26</sup>  | Moderate/High<br>⊕⊕⊕○ | The effect estimate as the true effect is likely to be close to the estimate of the effect.                                                                |
| Ward MC et al 2017 <sup>61</sup>      | Moderate/High<br>⊕⊕⊕○ | The effect estimate as the true effect is likely to be close to the estimate of the effect.                                                                |
| Aguiar PN Jr et al 2017 <sup>27</sup> | Moderate<br>⊕⊕⊕○      | The effect estimate as the true effect is likely to be close to the estimate of the effect, but there is a possibility that it is quite different.         |
| Huang M et al 2017 <sup>29</sup>      | Moderate/High<br>⊕⊕⊕○ | The effect estimate as the true effect is likely to be close to the estimate of the effect.                                                                |

|                                           |                       |                                                                                             |
|-------------------------------------------|-----------------------|---------------------------------------------------------------------------------------------|
| Matter-Walstra K et al 2016 <sup>46</sup> | Moderate/High<br>⊕⊕⊕○ | The effect estimate as the true effect is likely to be close to the estimate of the effect. |
|-------------------------------------------|-----------------------|---------------------------------------------------------------------------------------------|
